# Supplementary material for: Deciphering the electrochemical sensing capability of novel Ga12As12 nanocluster towards chemical warfare phosgene gas: insights from DFT
Source: Royal Society of Chemistry journal article supplement (doi:10.1039/d3ra05086f), 2023-01-01
Supplement: d3ra05086f1.pdf [file d3ra05086f1.pdf]

## **Deciphering the electrochemical sensing capability of novel Ga<sub>12</sub>As<sub>12</sub> nanocluster towards chemical warfare phosgene gas: Insight from DFT**

Muhammad Javed,<sup>1</sup> Muhammad Usman Khan,\*<sup>1</sup> Riaz Hussain,\*<sup>1</sup> Sarfraz Ahmed,<sup>2</sup> Tansir Ahamad,<sup>3</sup>

<sup>1</sup>*Department of Chemistry, University of Okara, Okara-56300, Pakistan*

<sup>2</sup>*Wellman Center for Photomedicine, Harvard Medical School, Massachusetts General Hospital, Boston, MA 02114, United States*

<sup>3</sup>*Department of Chemistry, College of Science, King Saud University, Saudi Arabia*

### **\* Corresponding authors E-mail addresses:**

- **Dr. Muhammad Usman Khan**

E-mail ids: [usman.chemistry@gmail.com](mailto:usman.chemistry@gmail.com); [usmankhan@uo.edu.pk](mailto:usmankhan@uo.edu.pk)

- **Dr. Riaz Hussain**

E-mail ids: [riazhussain@uo.edu.pk](mailto:riazhussain@uo.edu.pk)

**Table S1:** The interaction distance of phosgene atoms with the most closed Gallium and Arsenide atoms of the nanocluster calculated at B3LYP-D3/6-31G(d, p) level of theory.

| System                                     | D(Ga)                              |      | D(As)                             |      |
|--------------------------------------------|------------------------------------|------|-----------------------------------|------|
|                                            | IA                                 | ID   | IA                                | ID   |
| Surface- Ga <sub>12</sub> As <sub>12</sub> |                                    |      |                                   |      |
| MS1                                        | Ga <sub>9</sub> -O <sub>28</sub>   | 3.21 | As <sub>19</sub> -O <sub>28</sub> | 3.23 |
| MS2                                        | Ga <sub>2</sub> -Cl <sub>26</sub>  | 3.56 | As <sub>13</sub> -C <sub>25</sub> | 3.38 |
| MS3                                        | Ga <sub>10</sub> -Cl <sub>27</sub> | 3.46 | As <sub>22</sub> -O <sub>28</sub> | 3.29 |
| MS4                                        | Ga <sub>11</sub> -Cl <sub>26</sub> | 3.44 | As <sub>22</sub> -O <sub>28</sub> | 3.21 |
| MS5                                        | Ga <sub>3</sub> -O <sub>28</sub>   | 2.57 | As <sub>14</sub> -O <sub>28</sub> | 3.57 |
| MS6                                        | Ga <sub>3</sub> -O <sub>28</sub>   | 2.83 | As <sub>15</sub> -O <sub>28</sub> | 3.42 |
| MS7                                        | Ga <sub>6</sub> -O <sub>28</sub>   | 2.55 | As <sub>13</sub> -O <sub>28</sub> | 3.58 |
| MS8                                        | Ga <sub>6</sub> -C <sub>25</sub>   | 3.33 | As <sub>19</sub> -O <sub>28</sub> | 3.43 |
| MS9                                        | Ga <sub>6</sub> -O <sub>28</sub>   | 2.85 | As <sub>13</sub> -O <sub>28</sub> | 3.48 |
| MS10                                       | Ga <sub>11</sub> -Cl <sub>26</sub> | 3.52 | As <sub>22</sub> -C <sub>25</sub> | 3.37 |

D (Ga) = distance of gas with closest Ga atom of the nanocluster, D (As) = distance of gas with closest As atom of the nanocluster, IA=interacted atoms, ID=interaction distance. The distance is measured in Å<sup>0</sup>.

**Table S2:** The calculated second order perturbation energy (**E<sup>2</sup> Kcal/mol**) for the remaining transitions of the studied system.

| Type       | Donor                              | Type | Acceptor                           | E <sup>2</sup> (kcal/mol) | E (j) – E (i) | F (i,j) |
|------------|------------------------------------|------|------------------------------------|---------------------------|---------------|---------|
| <b>MS1</b> |                                    |      |                                    |                           |               |         |
| σ          | Ga <sub>4</sub> -As <sub>21</sub>  | σ *  | Ga <sub>5</sub> -As <sub>19</sub>  | 9.31                      | 0.51          | 0.062   |
| σ          | Ga <sub>4</sub> -As <sub>21</sub>  | π*   | C <sub>25</sub> -O <sub>28</sub>   | 0.27                      | 0.35          | 0.009   |
| π          | C <sub>25</sub> -O <sub>28</sub>   | π*   | C <sub>25</sub> -O <sub>28</sub>   | 0.54                      | 0.4           | 0.014   |
| π          | C <sub>25</sub> -O <sub>28</sub>   | σ*   | Ga <sub>9</sub> -As <sub>18</sub>  | 0.82                      | 0.82          | 0.025   |
| <b>MS2</b> |                                    |      |                                    |                           |               |         |
| σ          | Ga <sub>4</sub> -As <sub>21</sub>  | σ*   | Ga <sub>5</sub> -As <sub>19</sub>  | 9.67                      | 0.5           | 0.062   |
| σ          | Ga <sub>1</sub> -As <sub>13</sub>  | π*   | C <sub>25</sub> -O <sub>28</sub>   | 0.11                      | 0.37          | 0.006   |
| π          | C <sub>25</sub> -O <sub>28</sub>   | π*   | C <sub>25</sub> -O <sub>28</sub>   | 0.57                      | 0.41          | 0.014   |
| π          | C <sub>25</sub> -O <sub>28</sub>   | σ*   | Ga <sub>1</sub> -As <sub>13</sub>  | 0.33                      | 0.53          | 0.012   |
| <b>MS3</b> |                                    |      |                                    |                           |               |         |
| σ          | Ga <sub>11</sub> -As <sub>23</sub> | σ*   | Ga <sub>10</sub> -As <sub>21</sub> | 9.81                      | 0.5           | 0.063   |
| σ          | Ga <sub>10</sub> -As <sub>23</sub> | π*   | C <sub>25</sub> -O <sub>28</sub>   | 0.4                       | 0.36          | 0.011   |
| π          | C <sub>25</sub> -O <sub>28</sub>   | π*   | C <sub>25</sub> -O <sub>28</sub>   | 0.66                      | 0.39          | 0.015   |

|             |                                    |            |                                    |       |      |       |
|-------------|------------------------------------|------------|------------------------------------|-------|------|-------|
| $\pi$       | C <sub>25</sub> -O <sub>28</sub>   | $\sigma^*$ | Ga <sub>9</sub> -As <sub>23</sub>  | 0.43  | 0.55 | 0.014 |
| <b>MS4</b>  |                                    |            |                                    |       |      |       |
| $\sigma$    | Ga <sub>10</sub> -As <sub>22</sub> | $\sigma^*$ | Ga <sub>11</sub> -As <sub>24</sub> | 10.11 | 0.5  | 0.064 |
| $\sigma$    | Ga <sub>10</sub> -As <sub>23</sub> | $\pi^*$    | C <sub>25</sub> -O <sub>28</sub>   | 0.09  | 0.34 | 0.005 |
| $\pi$       | C <sub>25</sub> -O <sub>28</sub>   | $\pi^*$    | C <sub>25</sub> -O <sub>28</sub>   | 0.62  | 0.39 | 0.015 |
| $\pi$       | C <sub>25</sub> -O <sub>28</sub>   | $\sigma^*$ | Ga <sub>9</sub> -As <sub>23</sub>  | 0.23  | 0.56 | 0.011 |
| <b>MS5</b>  |                                    |            |                                    |       |      |       |
| $\sigma$    | Ga <sub>3</sub> -As <sub>16</sub>  | $\sigma^*$ | Ga <sub>12</sub> -As <sub>22</sub> | 9.99  | 0.51 | 0.064 |
| $\sigma$    | Ga <sub>3</sub> -As <sub>15</sub>  | $\pi^*$    | C <sub>25</sub> -O <sub>28</sub>   | 0.09  | 0.35 | 0.005 |
| $\pi$       | C <sub>25</sub> -O <sub>28</sub>   | $\pi^*$    | C <sub>25</sub> -O <sub>28</sub>   | 0.6   | 0.42 | 0.015 |
| $\pi$       | C <sub>25</sub> -O <sub>28</sub>   | $\sigma^*$ | Ga <sub>3</sub> -As <sub>15</sub>  | 0.24  | 0.57 | 0.011 |
| <b>MS6</b>  |                                    |            |                                    |       |      |       |
| $\sigma$    | Ga <sub>3</sub> -As <sub>14</sub>  | $\sigma^*$ | Ga <sub>3</sub> -As <sub>15</sub>  | 9.85  | 0.53 | 0.065 |
| $\sigma$    | Ga <sub>3</sub> -As <sub>15</sub>  | $\pi^*$    | C <sub>25</sub> -O <sub>28</sub>   | 0.07  | 0.34 | 0.004 |
| $\pi$       | C <sub>25</sub> -O <sub>28</sub>   | $\pi^*$    | C <sub>25</sub> -O <sub>28</sub>   | 0.66  | 0.39 | 0.015 |
| $\pi$       | C <sub>25</sub> -O <sub>28</sub>   | $\sigma^*$ | Ga <sub>12</sub> -As <sub>15</sub> | 0.11  | 0.54 | 0.007 |
| <b>MS7</b>  |                                    |            |                                    |       |      |       |
| $\sigma$    | Ga <sub>6</sub> -As <sub>18</sub>  | $\sigma^*$ | Ga <sub>9</sub> -As <sub>23</sub>  | 9.76  | 0.51 | 0.064 |
| $\sigma$    | Ga <sub>6</sub> -As <sub>18</sub>  | $\pi^*$    | C <sub>25</sub> -O <sub>28</sub>   | 0.11  | 0.33 | 0.005 |
| $\pi$       | C <sub>25</sub> -O <sub>28</sub>   | $\pi^*$    | C <sub>25</sub> -O <sub>28</sub>   | 0.74  | 0.38 | 0.016 |
| $\pi$       | C <sub>25</sub> -O <sub>28</sub>   | $\sigma^*$ | Ga <sub>6</sub> -As <sub>18</sub>  | 0.13  | 0.55 | 0.008 |
| <b>MS8</b>  |                                    |            |                                    |       |      |       |
| $\sigma$    | Ga <sub>9</sub> -As <sub>19</sub>  | $\sigma^*$ | Ga <sub>6</sub> -As <sub>13</sub>  | 11.09 | 0.49 | 0.066 |
| $\sigma$    | Ga <sub>6</sub> -As <sub>13</sub>  | $\pi^*$    | C <sub>25</sub> -O <sub>28</sub>   | 0.1   | 0.43 | 0.006 |
| $\pi$       | C <sub>25</sub> -O <sub>28</sub>   | $\sigma^*$ | Ga <sub>5</sub> -As <sub>19</sub>  | 0.21  | 0.58 | 0.01  |
| <b>MS9</b>  |                                    |            |                                    |       |      |       |
| $\sigma$    | Ga <sub>9</sub> -As <sub>18</sub>  | $\sigma^*$ | Ga <sub>6</sub> -As <sub>13</sub>  | 9.88  | 0.49 | 0.063 |
| $\sigma$    | Ga <sub>6</sub> -As <sub>19</sub>  | $\pi^*$    | C <sub>25</sub> -O <sub>28</sub>   | 0.75  | 0.37 | 0.015 |
| $\pi$       | C <sub>25</sub> -O <sub>28</sub>   | $\sigma^*$ | Ga <sub>6</sub> -As <sub>18</sub>  | 0.33  | 0.57 | 0.013 |
| <b>MS10</b> |                                    |            |                                    |       |      |       |
| $\sigma$    | Ga <sub>10</sub> -As <sub>23</sub> | $\sigma^*$ | Ga <sub>11</sub> -As <sub>24</sub> | 9.87  | 0.5  | 0.063 |
| $\sigma$    | Ga <sub>11</sub> -As <sub>22</sub> | $\pi^*$    | C <sub>25</sub> -O <sub>28</sub>   | 0.2   | 0.36 | 0.008 |
| $\pi$       | C <sub>25</sub> -O <sub>28</sub>   | $\pi^*$    | C <sub>25</sub> -O <sub>28</sub>   | 0.58  | 0.4  | 0.014 |
| $\pi$       | C <sub>25</sub> -O <sub>28</sub>   | $\sigma^*$ | Ga <sub>12</sub> -As <sub>22</sub> | 0.29  | 0.55 | 0.012 |

---

**Table S3:** Thermodynamics parameters of the studied system include heat capacity ( $C_V$ ), entropy (S), electronic energy ( $E_0$ ), zero-point energy ( $E_{ZPE}$ ), Thermal correction for enthalpy ( $H_{corr}$ ) and Gibbs energy ( $G_{corr}$ ). All parameters are in Hartree. Here,  $\Delta_f H^0$  and  $\Delta_f G^0$  are enthalpy and Gibbs energy of formation at 298K temperature.

| Parameters            | Ga <sub>12</sub> As <sub>12</sub> | Phosgene   | MS1               |
|-----------------------|-----------------------------------|------------|-------------------|
| $C_V$                 | 127.924                           | 11.85      | 145.54            |
| S                     | 273.207                           | 67.80      | 307.499           |
| $E_0$                 | -49881.8826                       | -1033.7155 | -50915.6365       |
| $E_{ZPE}$             | 0.0257                            | 0.0104     | 0.0372            |
| $E_{tot}$             | 0.0697                            | 0.0144     | 0.0870            |
| $H_{corr}$            | 0.0707                            | 0.0153     | 0.0880            |
| $G_{corr}$            | -0.0591                           | -0.0168    | -0.0581           |
| $E_0+E_{ZPE}$         | -49881.8569                       | -1033.7050 | -50915.5992       |
| $E_0+E_{tot}$         | -49881.8129                       | -1033.7010 | -50915.5494       |
| $E_0+H_{corr}$        | -49881.8119                       | -1033.7001 | -50915.5485       |
| $E_0+G_{corr}$        | -49881.9417                       | -1033.7323 | -50915.6946       |
| $\Delta_f H^0$ (298K) |                                   |            | -22.8441 kcal/mol |
| $\Delta_f G^0$ (298K) |                                   |            | -12.8537 kcal/mol |

  

| Parameters            | Ga <sub>12</sub> As <sub>12</sub> | Phosgene   | MS2               |
|-----------------------|-----------------------------------|------------|-------------------|
| $C_V$                 | 127.924                           | 11.85      | 145.657           |
| S                     | 273.207                           | 67.80      | 308.205           |
| $E_0$                 | -49881.8826                       | -1033.7155 | -50915.6337       |
| $E_{ZPE}$             | 0.0257                            | 0.0104     | 0.0371            |
| $E_{tot}$             | 0.0697                            | 0.0144     | 0.0870            |
| $H_{corr}$            | 0.0707                            | 0.0153     | 0.0879            |
| $G_{corr}$            | -0.0591                           | -0.0168    | -0.0584           |
| $E_0+E_{ZPE}$         | -49881.8569                       | -1033.7050 | -50915.5965       |
| $E_0+E_{tot}$         | -49881.8129                       | -1033.7010 | -50915.5467       |
| $E_0+H_{corr}$        | -49881.8119                       | -1033.7001 | -50915.5457       |
| $E_0+G_{corr}$        | -49881.9417                       | -1033.7323 | -50915.6922       |
| $\Delta_f H^0$ (298K) |                                   |            | -21.1185 kcal/mol |
| $\Delta_f G^0$ (298K) |                                   |            | -11.3382 kcal/mol |

| Parameters                           | Ga <sub>12</sub> As <sub>12</sub> | Phosgene   | MS3               |
|--------------------------------------|-----------------------------------|------------|-------------------|
| C <sub>V</sub>                       | 127.924                           | 11.85      | 145.596           |
| S                                    | 273.207                           | 67.80      | 312.922           |
| E <sub>0</sub>                       | -49881.8826                       | -1033.7155 | -50915.6305       |
| E <sub>ZPE</sub>                     | 0.0257                            | 0.0104     | 0.0370            |
| E <sub>tot</sub>                     | 0.0697                            | 0.0144     | 0.0870            |
| H <sub>corr</sub>                    | 0.0707                            | 0.0153     | 0.0879            |
| G <sub>corr</sub>                    | -0.0591                           | -0.0168    | -0.0606           |
| E <sub>0</sub> +E <sub>ZPE</sub>     | -49881.8569                       | -1033.7050 | -50915.5934       |
| E <sub>0</sub> +E <sub>tot</sub>     | -49881.8129                       | -1033.7010 | -50915.5434       |
| E <sub>0</sub> +H <sub>corr</sub>    | -49881.8119                       | -1033.7001 | -50915.5425       |
| E <sub>0</sub> +G <sub>corr</sub>    | -49881.9417                       | -1033.7323 | -50915.6912       |
| Δ <sub>r</sub> H <sup>0</sup> (298K) |                                   |            | -19.0916 kcal/mol |
| Δ <sub>r</sub> G <sup>0</sup> (298K) |                                   |            | -10.7183 kcal/mol |

| Parameters                           | Ga <sub>12</sub> As <sub>12</sub> | Phosgene   | MS4               |
|--------------------------------------|-----------------------------------|------------|-------------------|
| C <sub>V</sub>                       | 127.924                           | 11.85      | 145.573           |
| S                                    | 273.207                           | 67.80      | 309.659           |
| E <sub>0</sub>                       | -49881.8826                       | -1033.7155 | -50915.6279       |
| E <sub>ZPE</sub>                     | 0.0257                            | 0.0104     | 0.0370            |
| E <sub>tot</sub>                     | 0.0697                            | 0.0144     | 0.0869            |
| H <sub>corr</sub>                    | 0.0707                            | 0.0153     | 0.0878            |
| G <sub>corr</sub>                    | -0.0591                           | -0.0168    | -0.0592           |
| E <sub>0</sub> +E <sub>ZPE</sub>     | -49881.8569                       | -1033.7050 | -50915.5908       |
| E <sub>0</sub> +E <sub>tot</sub>     | -49881.8129                       | -1033.7010 | -50915.5409       |
| E <sub>0</sub> +H <sub>corr</sub>    | -49881.8119                       | -1033.7001 | -50915.5400       |
| E <sub>0</sub> +G <sub>corr</sub>    | -49881.9417                       | -1033.7323 | -50915.6871       |
| Δ <sub>r</sub> H <sup>0</sup> (298K) |                                   |            | -17.5241 kcal/mol |
| Δ <sub>r</sub> G <sup>0</sup> (298K) |                                   |            | -8.1775 kcal/mol  |

| Parameters       | Ga <sub>12</sub> As <sub>12</sub> | Phosgene   | MS5         |
|------------------|-----------------------------------|------------|-------------|
| C <sub>V</sub>   | 127.924                           | 11.85      | 145.414     |
| S                | 273.207                           | 67.80      | 312.114     |
| E <sub>0</sub>   | -49881.8826                       | -1033.7155 | -50915.6309 |
| E <sub>ZPE</sub> | 0.0257                            | 0.0104     | 0.0371      |

|                       |             |            |                   |
|-----------------------|-------------|------------|-------------------|
| $E_{\text{tot}}$      | 0.0697      | 0.0144     | 0.0870            |
| $H_{\text{corr}}$     | 0.0707      | 0.0153     | 0.0880            |
| $G_{\text{corr}}$     | -0.0591     | -0.0168    | -0.0602           |
| $E_0+E_{\text{ZPE}}$  | -49881.8569 | -1033.7050 | -50915.5937       |
| $E_0+E_{\text{tot}}$  | -49881.8129 | -1033.7010 | -50915.5438       |
| $E_0+H_{\text{corr}}$ | -49881.8119 | -1033.7001 | -50915.5428       |
| $E_0+G_{\text{corr}}$ | -49881.9417 | -1033.7323 | -50915.6911       |
| $\Delta_f H^0$ (298K) |             |            | -19.3157 kcal/mol |
| $\Delta_r G^0$ (298K) |             |            | -10.7007 kcal/mol |

| Parameters            | $\text{Ga}_{12}\text{As}_{12}$ | Phosgene   | MS6               |
|-----------------------|--------------------------------|------------|-------------------|
| $C_V$                 | 127.924                        | 11.85      | 145.449           |
| S                     | 273.207                        | 67.80      | 308.549           |
| $E_0$                 | -49881.8826                    | -1033.7155 | -50915.6321       |
| $E_{\text{ZPE}}$      | 0.0257                         | 0.0104     | 0.0373            |
| $E_{\text{tot}}$      | 0.0697                         | 0.0144     | 0.0870            |
| $H_{\text{corr}}$     | 0.0707                         | 0.0153     | 0.0880            |
| $G_{\text{corr}}$     | -0.0591                        | -0.0168    | -0.0585           |
| $E_0+E_{\text{ZPE}}$  | -49881.8569                    | -1033.7050 | -50915.5948       |
| $E_0+E_{\text{tot}}$  | -49881.8129                    | -1033.7010 | -50915.5450       |
| $E_0+H_{\text{corr}}$ | -49881.8119                    | -1033.7001 | -50915.5440       |
| $E_0+G_{\text{corr}}$ | -49881.9417                    | -1033.7323 | -50915.6906       |
| $\Delta_f H^0$ (298K) |                                |            | -20.0674 kcal/mol |
| $\Delta_r G^0$ (298K) |                                |            | -10.3895 kcal/mol |

| Parameters           | $\text{Ga}_{12}\text{As}_{12}$ | Phosgene   | MS7         |
|----------------------|--------------------------------|------------|-------------|
| $C_V$                | 127.924                        | 11.85      | 145.406     |
| S                    | 273.207                        | 67.80      | 311.407     |
| $E_0$                | -49881.8826                    | -1033.7155 | -50915.6310 |
| $E_{\text{ZPE}}$     | 0.0257                         | 0.0104     | 0.0371      |
| $E_{\text{tot}}$     | 0.0697                         | 0.0144     | 0.0870      |
| $H_{\text{corr}}$    | 0.0707                         | 0.0153     | 0.0880      |
| $G_{\text{corr}}$    | -0.0591                        | -0.0168    | -0.0599     |
| $E_0+E_{\text{ZPE}}$ | -49881.8569                    | -1033.7050 | -50915.5939 |
| $E_0+E_{\text{tot}}$ | -49881.8129                    | -1033.7010 | -50915.5440 |

|                       |             |            |                   |
|-----------------------|-------------|------------|-------------------|
| $E_0+H_{\text{corr}}$ | -49881.8119 | -1033.7001 | -50915.5430       |
| $E_0+G_{\text{corr}}$ | -49881.9417 | -1033.7323 | -50915.6910       |
| $\Delta_f H^0$ (298K) |             |            | -19.4173 kcal/mol |
| $\Delta_r G^0$ (298K) |             |            | -10.5922 kcal/mol |

| Parameters            | $\text{Ga}_{12}\text{As}_{12}$ | Phosgene   | MS8               |
|-----------------------|--------------------------------|------------|-------------------|
| $C_V$                 | 127.924                        | 11.85      | 145.542           |
| S                     | 273.207                        | 67.80      | 307.471           |
| $E_0$                 | -49881.8826                    | -1033.7155 | -50915.6324       |
| $E_{\text{ZPE}}$      | 0.0257                         | 0.0104     | 0.0372            |
| $E_{\text{tot}}$      | 0.0697                         | 0.0144     | 0.0870            |
| $H_{\text{corr}}$     | 0.0707                         | 0.0153     | 0.0880            |
| $G_{\text{corr}}$     | -0.0591                        | -0.0168    | -0.0580           |
| $E_0+E_{\text{ZPE}}$  | -49881.8569                    | -1033.7050 | -50915.5951       |
| $E_0+E_{\text{tot}}$  | -49881.8129                    | -1033.7010 | -50915.5453       |
| $E_0+H_{\text{corr}}$ | -49881.8119                    | -1033.7001 | -50915.5444       |
| $E_0+G_{\text{corr}}$ | -49881.9417                    | -1033.7323 | -50915.6905       |
| $\Delta_f H^0$ (298K) |                                |            | -20.2732 kcal/mol |
| $\Delta_r G^0$ (298K) |                                |            | -10.2740 kcal/mol |

| Parameters            | $\text{Ga}_{12}\text{As}_{12}$ | Phosgene   | MS9               |
|-----------------------|--------------------------------|------------|-------------------|
| $C_V$                 | 127.924                        | 11.85      | 145.505           |
| S                     | 273.207                        | 67.80      | 309.109           |
| $E_0$                 | -49881.8826                    | -1033.7155 | -50915.6329       |
| $E_{\text{ZPE}}$      | 0.0257                         | 0.0104     | 0.0371            |
| $E_{\text{tot}}$      | 0.0697                         | 0.0144     | 0.087039          |
| $H_{\text{corr}}$     | 0.0707                         | 0.0153     | 0.0879            |
| $G_{\text{corr}}$     | -0.0591                        | -0.0168    | -0.0588           |
| $E_0+E_{\text{ZPE}}$  | -49881.8569                    | -1033.7050 | -50915.5958       |
| $E_0+E_{\text{tot}}$  | -49881.8129                    | -1033.7010 | -50915.5459       |
| $E_0+H_{\text{corr}}$ | -49881.8119                    | -1033.7001 | -50915.5450       |
| $E_0+G_{\text{corr}}$ | -49881.9417                    | -1033.7323 | -50915.6918       |
| $\Delta_f H^0$ (298K) |                                |            | -20.6397 kcal/mol |
| $\Delta_r G^0$ (298K) |                                |            | -11.1293 kcal/mol |

| Parameters                           | Ga <sub>12</sub> As <sub>12</sub> | Phosgene   | MS10              |
|--------------------------------------|-----------------------------------|------------|-------------------|
| C <sub>V</sub>                       | 127.924                           | 11.85      | 145.659           |
| S                                    | 273.207                           | 67.80      | 310.981           |
| E <sub>0</sub>                       | -49881.8826                       | -1033.7155 | -50915.630953     |
| E <sub>ZPE</sub>                     | 0.0257                            | 0.0104     | 0.037098          |
| E <sub>tot</sub>                     | 0.0697                            | 0.0144     | 0.087031          |
| H <sub>corr</sub>                    | 0.0707                            | 0.0153     | 0.087975          |
| G <sub>corr</sub>                    | -0.0591                           | -0.0168    | -0.059782         |
| E <sub>0</sub> +E <sub>ZPE</sub>     | -49881.8569                       | -1033.7050 | -50915.593855     |
| E <sub>0</sub> +E <sub>tot</sub>     | -49881.8129                       | -1033.7010 | -50915.543922     |
| E <sub>0</sub> +H <sub>corr</sub>    | -49881.8119                       | -1033.7001 | -50915.542978     |
| E <sub>0</sub> +G <sub>corr</sub>    | -49881.9417                       | -1033.7323 | -50915.690735     |
| Δ <sub>r</sub> H <sup>0</sup> (298K) |                                   |            | -19.3652 kcal/mol |
| Δ <sub>r</sub> G <sup>0</sup> (298K) |                                   |            | -10.4127 kcal/mol |

**Equations (1-5)** used to calculate the global indices of reactivity for the studied system.

$$\eta = \frac{I - A}{2} \quad (1)$$

$$\mu = \frac{-(I + A)}{2} \quad (2)$$

$$\omega = \frac{\mu^2}{2\eta} \quad (3)$$

$$s = \frac{1}{2\eta} \quad (4)$$

$$\Delta N_{max} = \frac{-\mu}{\eta} \quad (5)$$
